# Supplementary material for: Twin-assisted cracking degradation in sodium layered oxide cathodes
Source: Research Square preprint supplement (doi:10.21203/rs.3.rs-290193/v1), 2021-03-18
Supplement: Supplementary file 1 [file b0b19e0884820f14ae49afbc.docx]

**Twin-assisted cracking degradation in sodium layered oxide cathodes**

**Cheng Chen,1,3∥** **Zhen Han,2,∥****Chaoping Liang,1,∥ Yiming Feng,1 Peng Wang,*,2 and Weifeng Wei*,1**

*1State Key Laboratory of Powder Metallurgy, Central South University, Changsha, Hunan 410083, People's Republic of China.*

*2National Laboratory of Solid State Microstructures, College of Engineering and Applied Sciences, and Collaborative Innovation Center of Advanced Microstructures, Nanjing University, Nanjing, Jiangsu 210093, People’s Republic of China.*

*3School of Materials Science and Engineering, Guizhou Minzu University, Guiyang, Guizhou 550025, People's Republic of China.*


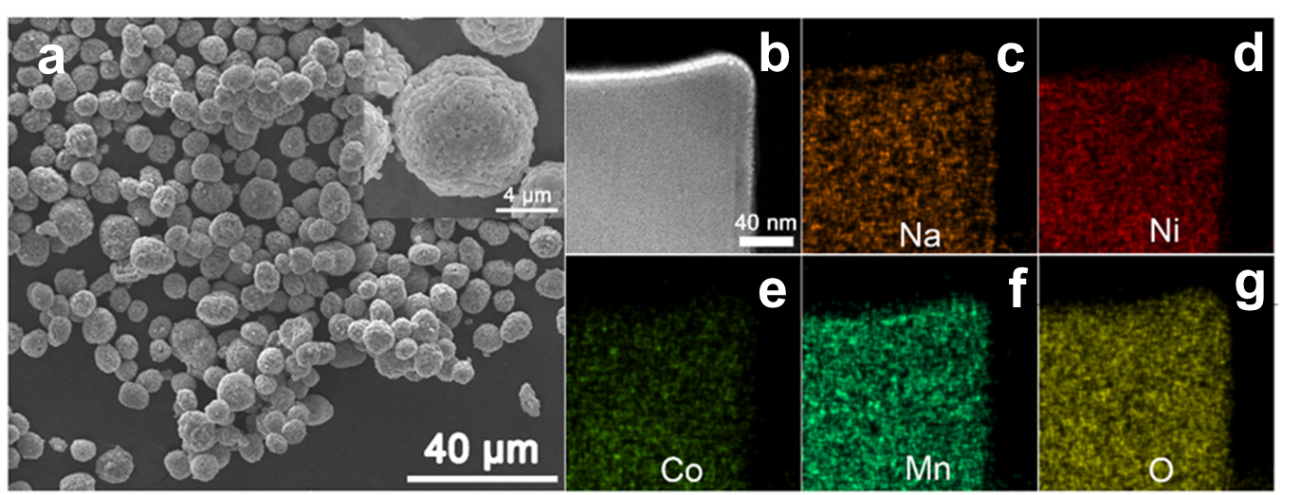


**Extended Data Fig. 1 Morphology and chemical information of as-prepared NNCM cathode material.** (a) Typical scanning electron microscopy (SEM) images. (b)-(g) STEM-HAADF image and elemental maps taken from cross-sectioned NNCM cathode material.


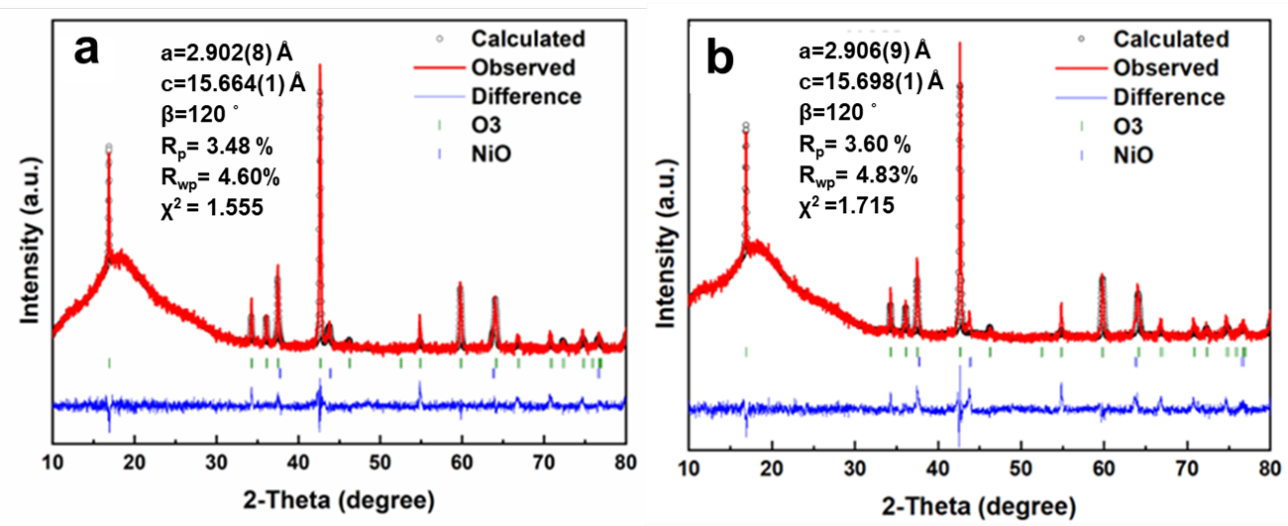


**Extended Data Fig. 2 XRD patterns and refined results.** (a) Pristine and (b) cycled NNCM cathode materials.


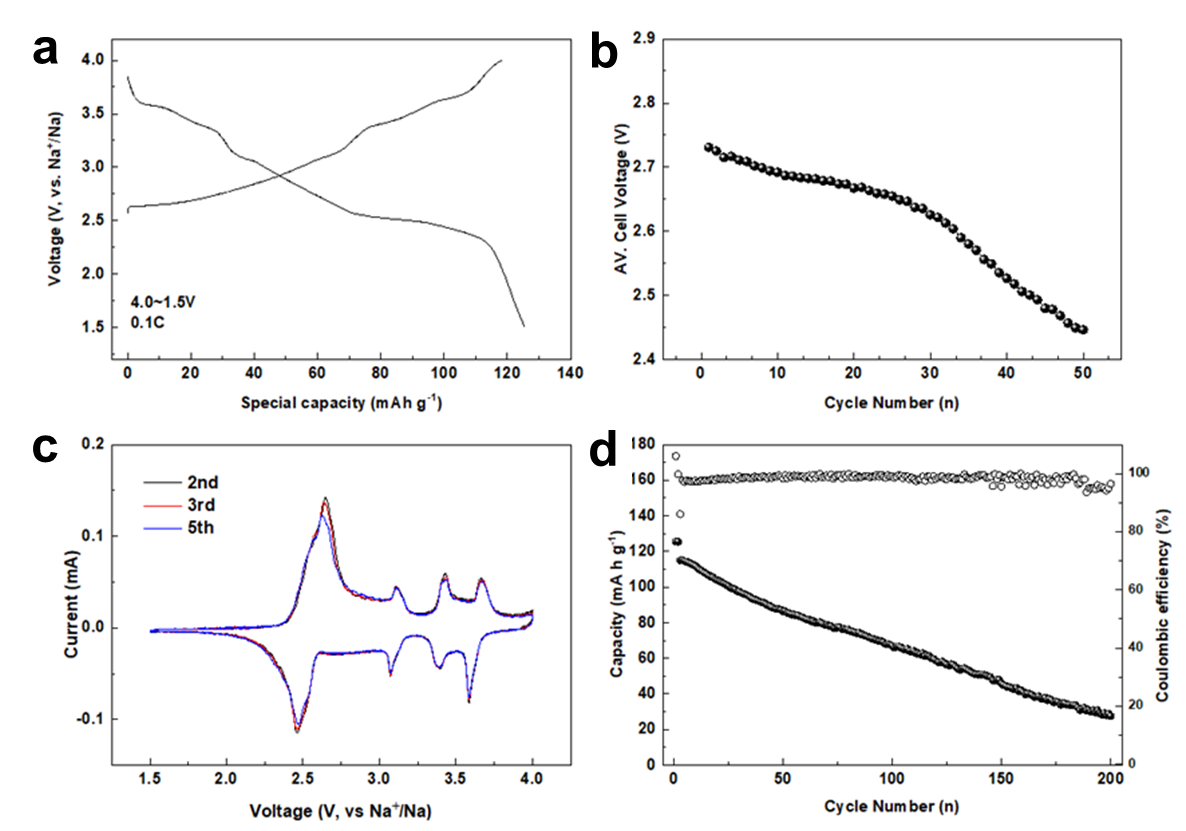


**Extended Data Fig. 3 Electrochemical performance of NNCM cathode.** (a) Initial charge and discharge profiles within 1.5-4.0V vs. Na+/Na at 0.1 C. (b) Average cell voltage upon extended cycles. (c) Cyclic voltammetry (CV) curves. (d) Electrochemical cycling properties up to 200 cycles.


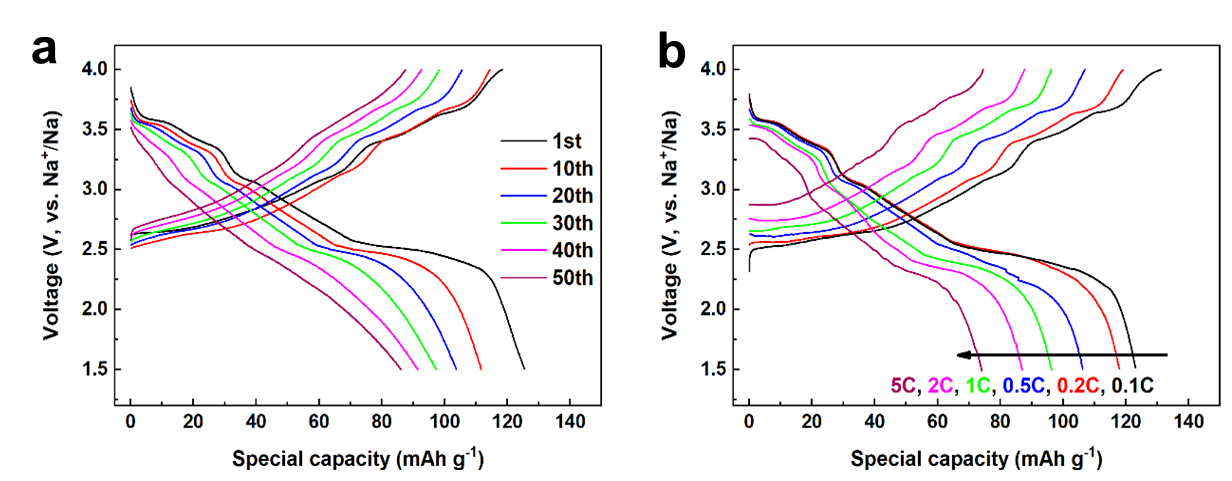


**Extended Data Fig. 4** **Electrochemical performance of NNCM cathode.** (a) Charge and discharge profiles during extended cycles. (b) Charge and discharge profiles tested at various C rates (0.1-5 C).


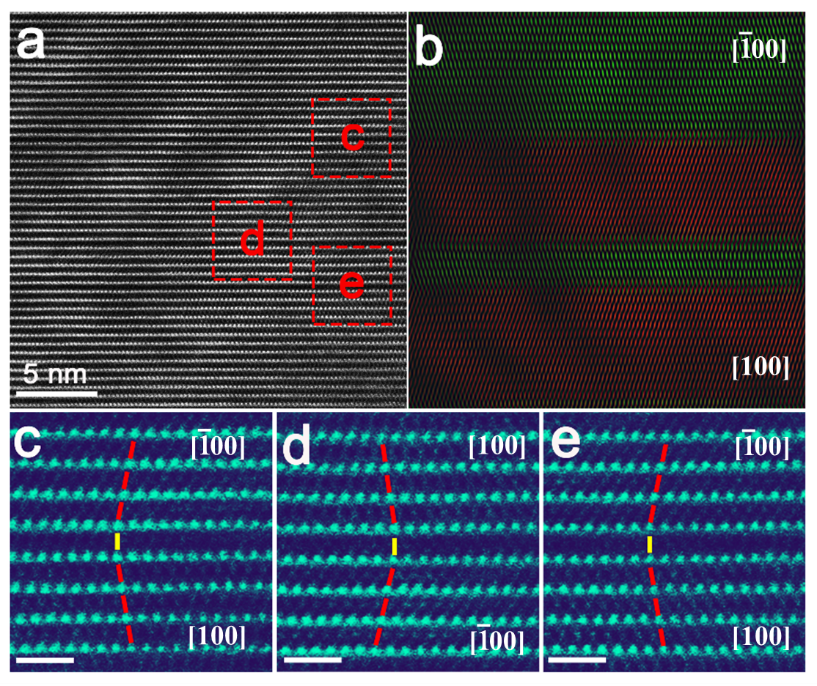


**Extended Data Fig. 5 Atomic-resolution STEM images visualizes multiple twins in a single pristine NNCM particle.** (a-e) STEM-HAADF images and corresponding reconstructed images of NNCM cathodes, demonstrating that twins widely exist and are stacking along [001] direction in pristine NNCM cathode. The scale bars are 1nm in c-e.


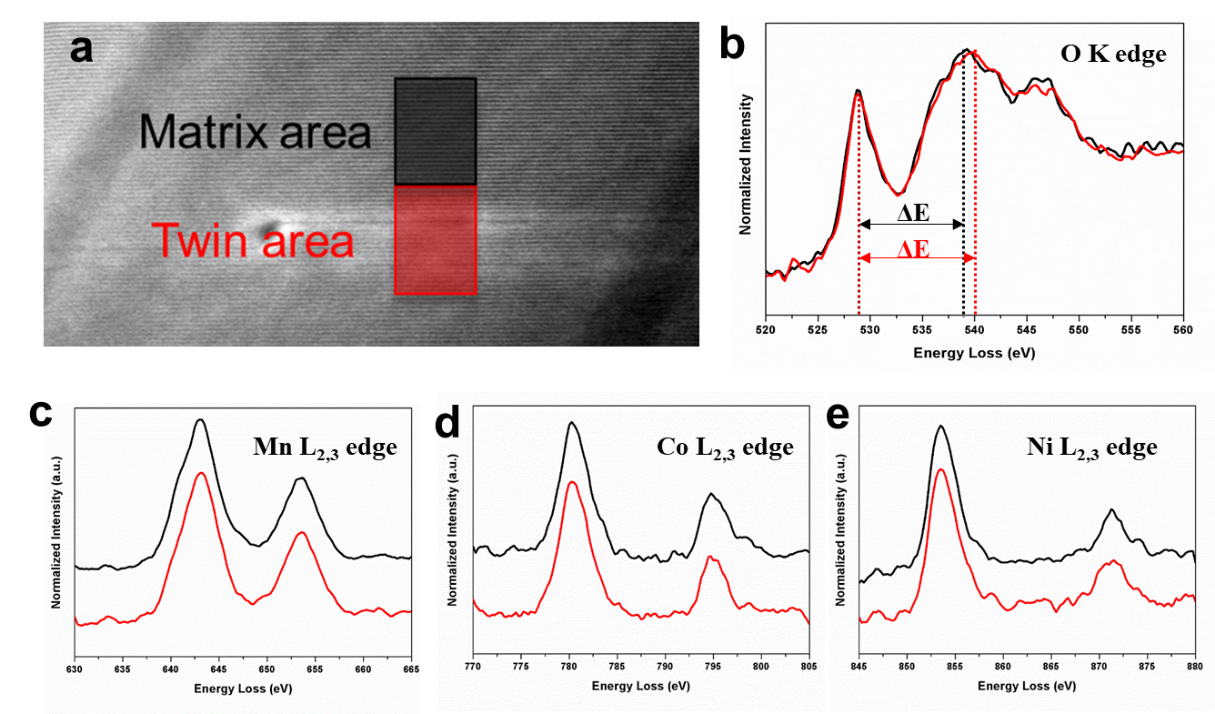


**Extended Data Fig. 6 Electronic information of O and TM elements around CTBs using EELS.** (a) STEM-ADF images of selected area for EELS acquisition around CTBs. The red and black rectangles indicate the acquisition areas for matrix area and CTBs area, respectively. (b-e) EELS spectra of O-*K* and TM-*L* edge acquired at selected areas in (a).


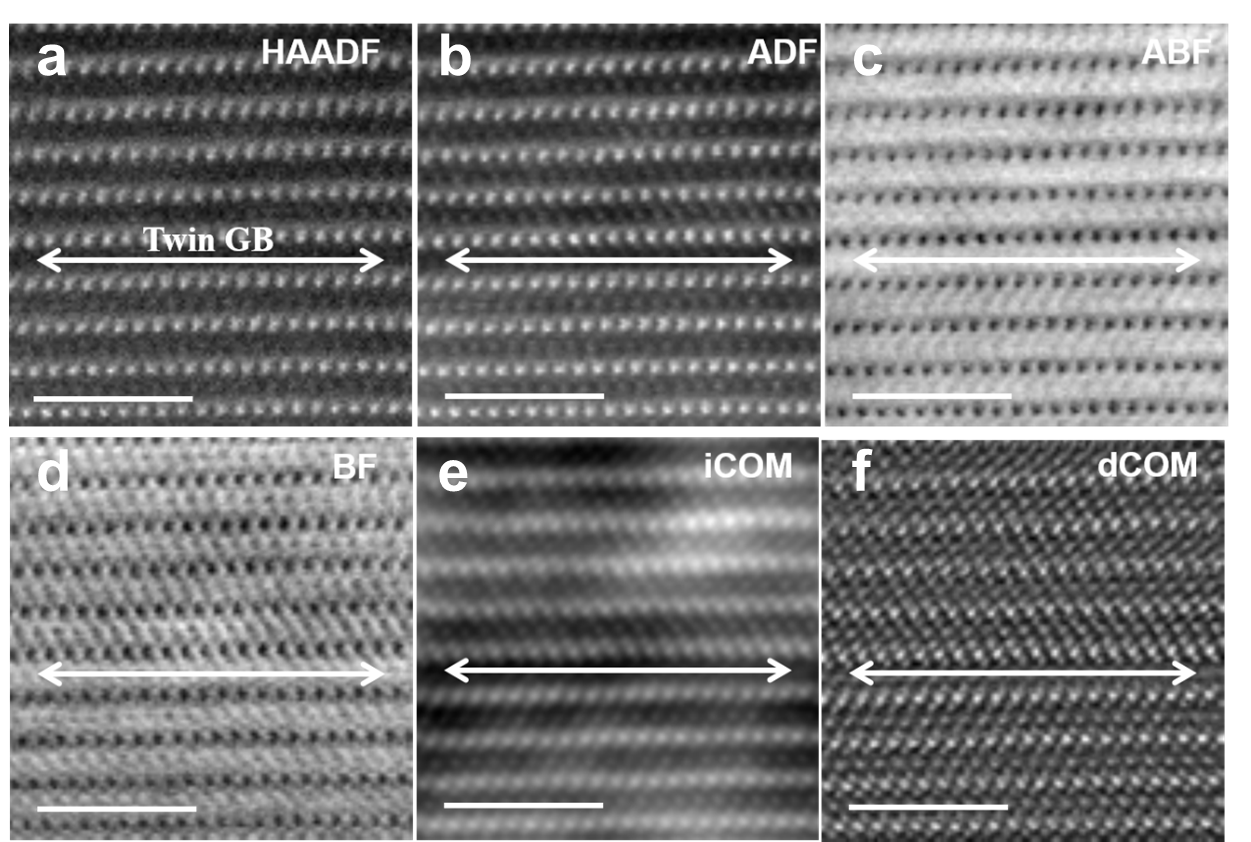


**Extended Data Fig. 7 Reconstructed images acquired by 4D STEM techniques of CTBs structure. The bar is 1nm.** Na and O atom columns were invisible in HAADF due to weaker scattering of electrons, and contrast of Na and O atom columns were ambiguous in ABF images due to rigorous imaging conditions. The phase reconstructed images, iCOM and dCOM images, showed all atom columns and confirmed the formation of P-type CTBs.


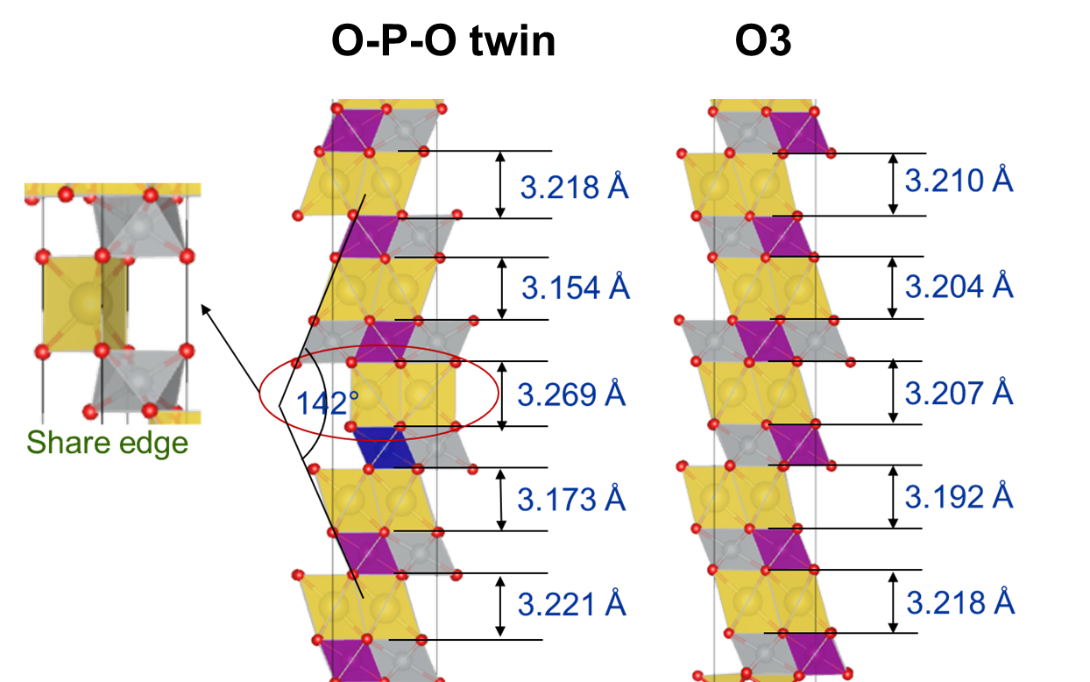


**Extended Data Fig. 8 Calculated interlayer distance of Na1-x[NCM211]O2.**


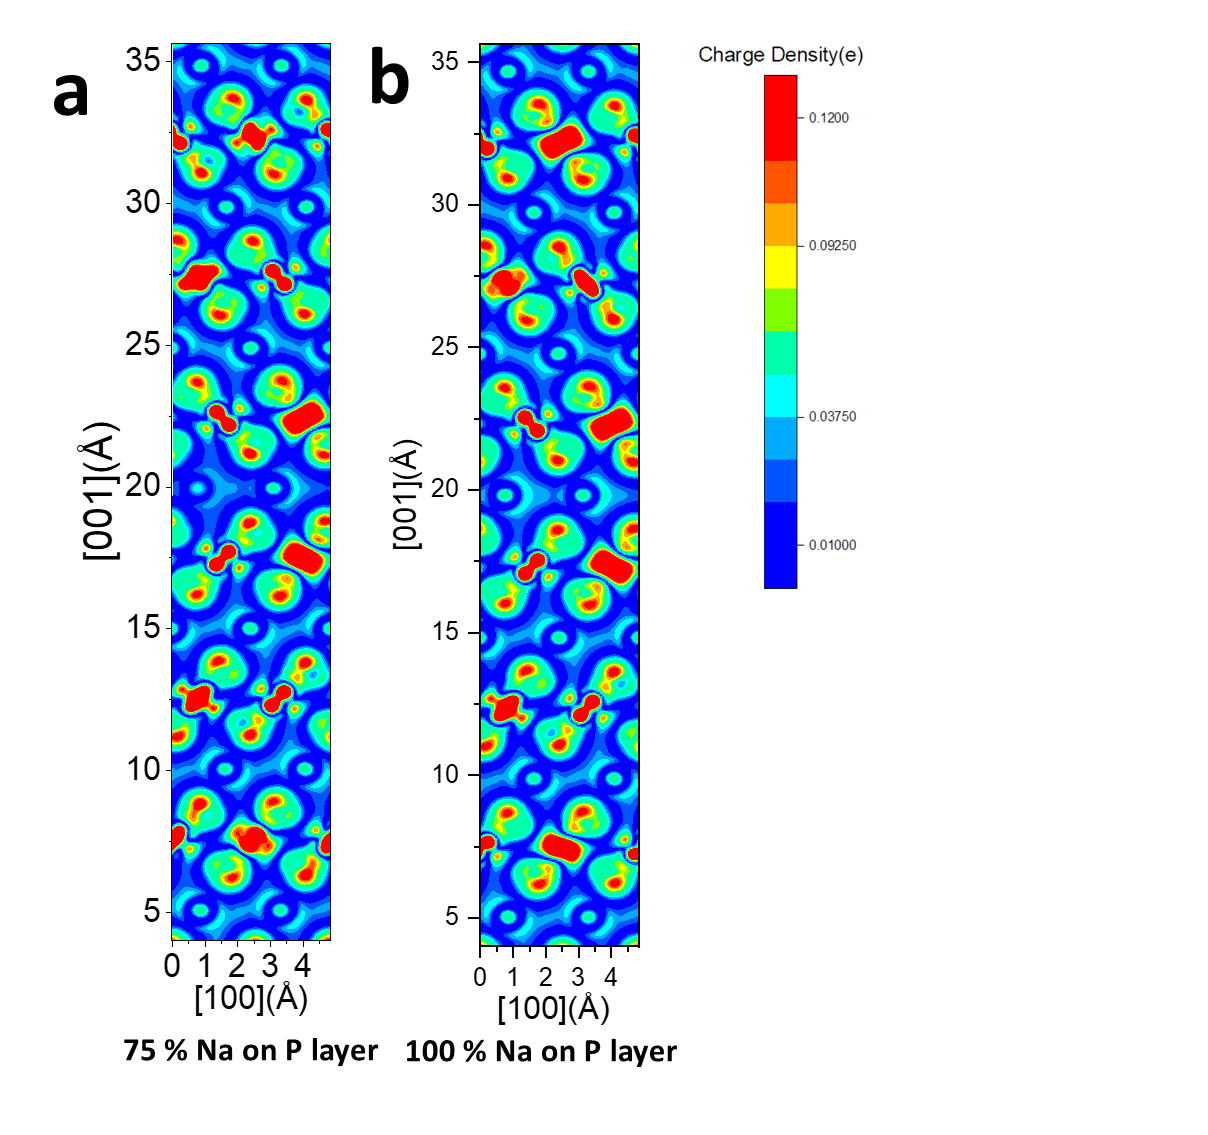


**Extended Data Fig. 9** Calculated charge density difference of Na1-x[NCM211]O2, (a) x=0; (b) x=0.25


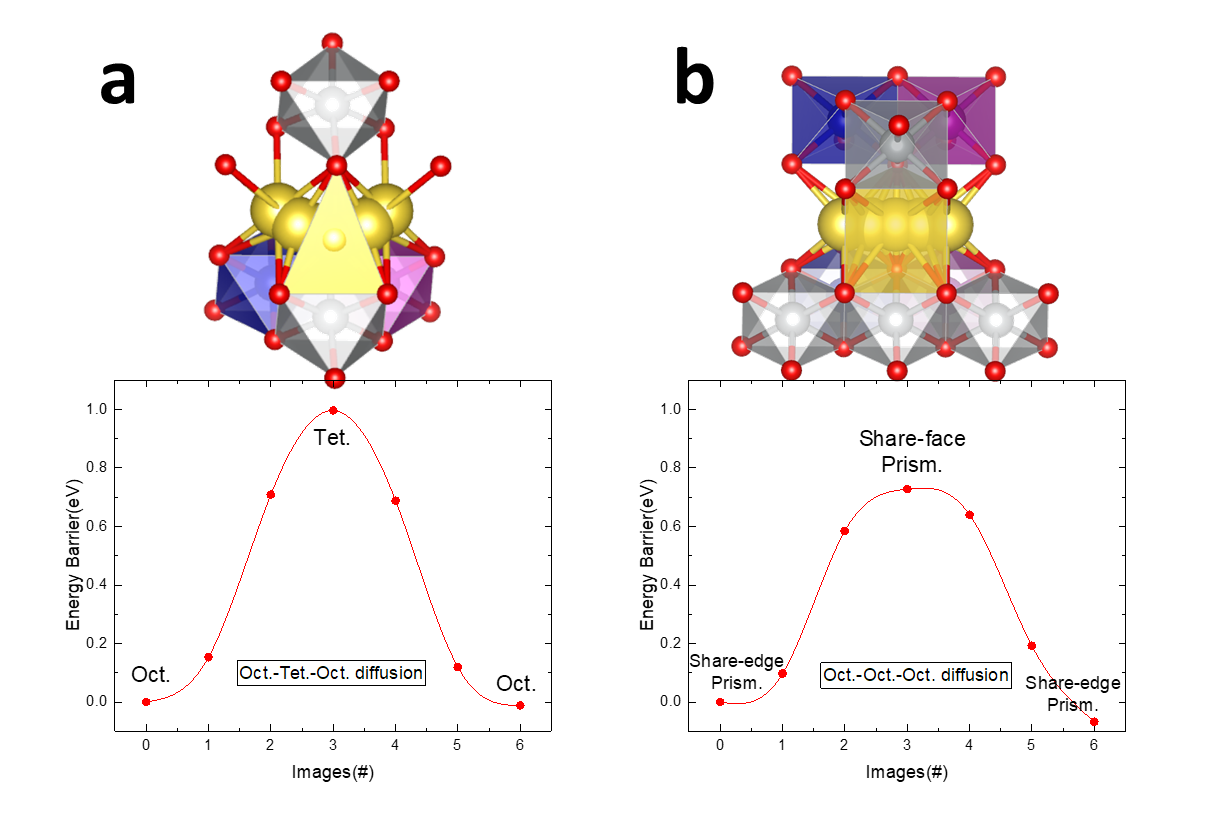


**Extended Data Fig. 10** Calculated diffusion barrier for (a) O3 and (b) P2Na1-x[NCM211]O2
